# Supplementary material for: Cubane-type {M4O4} (M = CoII, ZnII, CuII) clusters: synthesis, crystal structures, and luminescent and magnetic properties
Source: Royal Society of Chemistry journal article supplement (doi:10.1039/c5ra04868k), 2015-01-01
Supplement: c5ra04868k1.pdf [file c5ra04868k1.pdf]

## Supporting Information

### **Cubane-type $\{M_4O_4\}$ ( $M = Co^{II}, Zn^{II}, Cu^{II}$ ) clusters: synthesis, crystal structures, and luminescent and magnetic properties**

**Qian Gao,<sup>a</sup> Yaru Qin,<sup>a</sup> Yanmei Chen,<sup>a</sup> Wei Liu,<sup>a</sup> Haiyan Li,<sup>a</sup> Bing  
Wu,<sup>a</sup> Yahong Li<sup>\*a</sup> and Wu Li<sup>b</sup>**

<sup>a</sup> *Key Laboratory of Organic Synthesis of Jiangsu Province, College of  
Chemistry, Chemical Engineering and Materials Science, Soochow  
University, Suzhou 215123, China. E-mail: [liyahong@suda.edu.cn](mailto:liyahong@suda.edu.cn)*

<sup>b</sup> *Qinghai Institute of Salt Lakes, Chinese Academy of Sciences, Xining  
810008, China.*

|                                                                            |   |
|----------------------------------------------------------------------------|---|
| 1. Selected bond lengths [Å] and angles [°] for complexes <b>1-3</b> ..... | 2 |
| 2. IR spectra of complexes <b>1-3</b> .....                                | 5 |
| 3. XRD patterns of complexes <b>1-3</b> .....                              | 7 |

## 1. Selected bond lengths [Å] and angles [°] for complexes 1-3.

**Table S1** Selected bond lengths [Å] and angles [°] for complex 1.

| Selected bond length |            |                    |            |
|----------------------|------------|--------------------|------------|
| Co(1)-O(1)           | 1.945(3)   | Co(2)-O(2)         | 2.186(3)   |
| Co(1)-O(2)#1         | 2.054(3)   | Co(2)-O(4)         | 1.944(3)   |
| Co(1)-O(2)           | 2.186(3)   | Co(2)-O(5)         | 2.181(3)   |
| Co(1)-N(1)           | 2.008(3)   | Co(2)-O(5)#1       | 2.042(3)   |
| Co(1)-O(5)#1         | 2.057(3)   | Co(2)-N(2)         | 1.987(4)   |
| Co(1)···Co(2)        | 3.0971(10) | Co(2)···Co(2)#1    | 3.1488(13) |
| Co(1)···Co(1)#1      | 3.177(10)  | Co(1)···Co(2)#1    | 3.1802(10) |
| O(1)-Co(1)-N(1)      | 91.76(14)  | O(2)-Co(2)-O(5)    | 78.97(10)  |
| O(1)-Co(1)-O(2)#1    | 97.38(11)  | O(2)-Co(2)-O(5)#1  | 84.95(10)  |
| O(1)-Co(1)-O(5)#1    | 117.15(12) | O(4)-Co(2)-N(2)    | 92.97(14)  |
| O(1)-Co(1)-O(2)      | 161.71(12) | O(4)-Co(2)-O(2)    | 114.80(12) |
| O(2)#1-Co(1)-O(5)#1  | 81.62(10)  | O(4)-Co(2)-O(5)#1  | 96.29(12)  |
| O(2)#1-Co(1)-O(2)    | 82.23(10)  | O(4)-Co(2)-O(5)    | 166.15(13) |
| O(5)#1-Co(1)-O(2)    | 80.98(10)  | O(5)#1-Co(2)-O(5)  | 83.05(10)  |
| N(1)-Co(1)-O(2)#1    | 143.23(13) | N(2)-Co(2)-O(2)    | 124.84(14) |
| N(1)-Co(1)-O(2)      | 78.39(12)  | N(2)-Co(2)-O(5)    | 79.27(13)  |
| N(1)-Co(1)-O(5)#1    | 125.02(13) | N(2)-Co(2)-O(5)#1  | 140.77(14) |
| Co(1)#1-O(2)-Co(1)   | 96.96(10)  | Co(2)#1-O(5)-Co(2) | 96.33(10)  |
| Co(2)-O(2)-Co(1)     | 94.16(10)  | Co(2)-O(2)-Co(1)#1 | 101.91(10) |
| Co(2)#1-O(5)-Co(1)#1 | 98.14(11)  | Co(1)#1-O(5)-Co(2) | 97.20(10)  |

Symmetry transformations used to generate equivalent atoms: #1: -x,y,-z+1/2.

**Table S2** Hydrogen bond lengths [Å] and angles [°] for complex 1.

| D-H...A             | d(D-H) | d(H...A) | d(D...A) | <(DHA) |
|---------------------|--------|----------|----------|--------|
| O(3)-H(3A)...O(1)#1 | 0.82   | 2.21     | 2.780(6) | 127.2  |
| O(3)-H(3A)...O(7)#1 | 0.82   | 2.41     | 3.152(8) | 150.7  |

|                      |      |      |           |       |
|----------------------|------|------|-----------|-------|
| O(3')-H(3')...O(1)#1 | 0.82 | 2.05 | 2.759(12) | 144.1 |
| O(3')-H(3')...O(7)#1 | 0.82 | 2.24 | 2.778(13) | 123.4 |
| O(6)-H(6)...N(1)#1   | 0.82 | 2.47 | 3.27(2)   | 164.8 |
| O(6)-H(6)...O(4)#1   | 0.82 | 2.07 | 2.768(17) | 142.8 |
| O(6)-H(6)...O(5)     | 0.82 | 2.55 | 2.823(15) | 101.2 |
| C(16)-H(16)...O(3)#2 | 0.93 | 2.57 | 3.258(7)  | 131.2 |

Symmetry transformations used to generate equivalent atoms: #1: -x,y,-z+1/2 #2: -x,-y+1,-z+1

**Table S3** Selected bond lengths [Å] and angles [°] for complex **2**.

| Selected bond length |            |                    |            |
|----------------------|------------|--------------------|------------|
| Zn(1)-O(1)           | 1.939(2)   | Zn(2)-O(2)         | 2.013(2)   |
| Zn(1)-O(2)           | 2.221(2)   | Zn(2)-O(4)         | 1.948(2)   |
| Zn(1)-O(2)#1         | 2.051(2)   | Zn(2)-O(5)         | 2.224(2)   |
| Zn(1)-O(5)#1         | 2.016(2)   | Zn(2)-O(5)#1       | 2.033(2)   |
| Zn(1)-N(1)           | 2.026(3)   | Zn(2)-N(2)         | 1.995(3)   |
| Zn(1)···Zn(2)        | 3.0752(6)  | Zn(2)···Zn(1)#1    | 3.1475(6)  |
| Zn(1)···Zn(1)#1      | 3.2034(9)  | Zn(2)···Zn(2)#1    | 3.1662(8)  |
| O(1)-Zn(1)-O(2)#1    | 96.59(9)   | O(2)-Zn(2)-O(5)    | 79.08(8)   |
| O(1)-Zn(1)-O(2)      | 159.58(10) | O(2)-Zn(2)-O(5)#1  | 85.74(8)   |
| O(1)-Zn(1)-O(5)#1    | 119.36(10) | O(4)-Zn(2)-O(5)    | 164.99(10) |
| O(5)#1-Zn(1)-O(2)#1  | 83.27(9)   | O(4)-Zn(2)-O(2)    | 115.80(10) |
| O(5)#1-Zn(1)-O(2)    | 80.88(8)   | O(4)-Zn(2)-O(5)#1  | 95.14(10)  |
| O(2)#1-Zn(1)-O(2)    | 82.35(8)   | O(5)#1-Zn(2)-O(5)  | 83.48(9)   |
| O(1)-Zn(1)-N(1)      | 91.89(11)  | O(4)-Zn(2)-N(2)    | 93.07(12)  |
| O(5)#1-Zn(1)-N(1)    | 123.07(11) | N(2)-Zn(2)-O(2)    | 123.79(11) |
| N(1)-Zn(1)-O(2)#1    | 142.95(10) | N(2)-Zn(2)-O(5)    | 79.14(11)  |
| N(1)-Zn(1)-O(2)      | 77.58(9)   | N(2)-Zn(2)-O(5)#1  | 141.28(11) |
| Zn(1)#1-O(2)-Zn(1)   | 97.08(8)   | Zn(2)-O(2)-Zn(1)#1 | 101.52(9)  |
| Zn(1)#1-O(5)-Zn(2)   | 95.74(8)   | Zn(2)-O(2)-Zn(1)   | 93.02(8)   |
| Zn(1)#1-O(5)-Zn(2)#1 | 98.84(9)   | Zn(2)#1-O(5)-Zn(2) | 96.01(9)   |

Symmetry transformations used to generate equivalent atoms: #1: -x,y,-z+1/2.

**Table S4** Hydrogen bond lengths [ $\text{\AA}$ ] and angles [ $^\circ$ ] for complex **2**.

| D-H...A              | d(D-H) | d(H...A) | d(D...A)  | $\angle(\text{DHA})$ |
|----------------------|--------|----------|-----------|----------------------|
| O(3)-H(3A)...O(1)#1  | 0.82   | 2.19     | 2.759(5)  | 126.2                |
| O(3)-H(3A)...O(7)#1  | 0.82   | 2.39     | 3.122(6)  | 148.7                |
| O(3')-H(3')...O(1)#1 | 0.82   | 2.05     | 2.766(10) | 145.2                |
| O(3')-H(3')...O(7)#1 | 0.82   | 2.24     | 2.784(11) | 124.7                |
| O(6)-H(6)...O(8)#1   | 0.82   | 2.47     | 3.142(18) | 140.3                |
| O(6)-H(6)...O(4)#1   | 0.82   | 2.14     | 2.852(9)  | 145.6                |
| O(6')-H(6')...O(4)#1 | 0.82   | 1.96     | 2.779(17) | 173.4                |
| O(6')-H(6')...O(8)#1 | 0.82   | 2.31     | 2.73(2)   | 112.2                |
| C(16)-H(16)...O(3)#2 | 0.93   | 2.59     | 3.262(5)  | 129.6                |

Symmetry transformations used to generate equivalent atoms: #1:  $-x, y, -z+1/2$  #2:  $-x, -y+1, -z+1$

**Table S5** Selected bond lengths [ $\text{\AA}$ ] and angles [ $^\circ$ ] for complex **3**.

| Selected bond length     |            |                          |            |
|--------------------------|------------|--------------------------|------------|
| Cu(1)-O(1)               | 1.8925(18) | Cu(1)-N(1)               | 1.9287(2)  |
| Cu(1)-O(2)               | 1.9709(17) | Cu(1)-O(2)#1             | 1.9486(16) |
| Cu(1)-O(2)#3             | 2.4660(16) |                          |            |
| Cu(1) $\cdots$ Cu(1)#1   | 3.1080(5)  | Cu(1) $\cdots$ Cu(1)#3   | 3.4317(5)  |
| Cu(1) $\cdots$ Cu(1)#2   | 3.1080(5)  | Cu(1)#2 $\cdots$ Cu(1)#3 | 3.1080(5)  |
| Cu(1)#1 $\cdots$ Cu(1)#2 | 3.4317(5)  | Cu(1)#1 $\cdots$ Cu(1)#3 | 3.1080(5)  |
| O(1)-Cu(1)-O(2)#1        | 93.34(7)   | O(1)-Cu(1)-N(1)          | 93.35(8)   |
| O(1)-Cu(1)-O(2)          | 177.02(8)  | N(1)-Cu(1)-O(2)#1        | 168.13(8)  |
| O(2)#1-Cu(1)-O(2)        | 88.52(7)   | N(1)-Cu(1)-O(2)          | 84.43(8)   |
| Cu(1)#2-O(2)-Cu(1)       | 104.93(8)  |                          |            |

Symmetry transformations used to generate equivalent atoms: #1  $-y+3/2, x, -z+1/2$  #2  $y, -x+3/2, -z+1/2$ .

**Table S6** Hydrogen bond lengths [ $\text{\AA}$ ] and angles [ $^\circ$ ] for complex **3**.

| D-H...A            | d(D-H) | d(H...A) | d(D...A) | $\angle(\text{DHA})$ |
|--------------------|--------|----------|----------|----------------------|
| O(3)-H(3)...O(1)#3 | 0.82   | 2.11     | 2.924(3) | 171.1                |
| C(7)-H(7)...O(3)#4 | 0.93   | 2.55     | 3.442(4) | 161.3                |

C(9)-H(9)...O(1)#2

0.98

2.52

3.011(4)

110.7

Symmetry transformations used to generate equivalent atoms: #2:  $y, -x+3/2, -z+1/2$ , #3:  $-x+3/2, -y+3/2, z$ , #4:  $-y+3/2, x, -z+3/2$

## 2. IR spectra of complexes 1-3

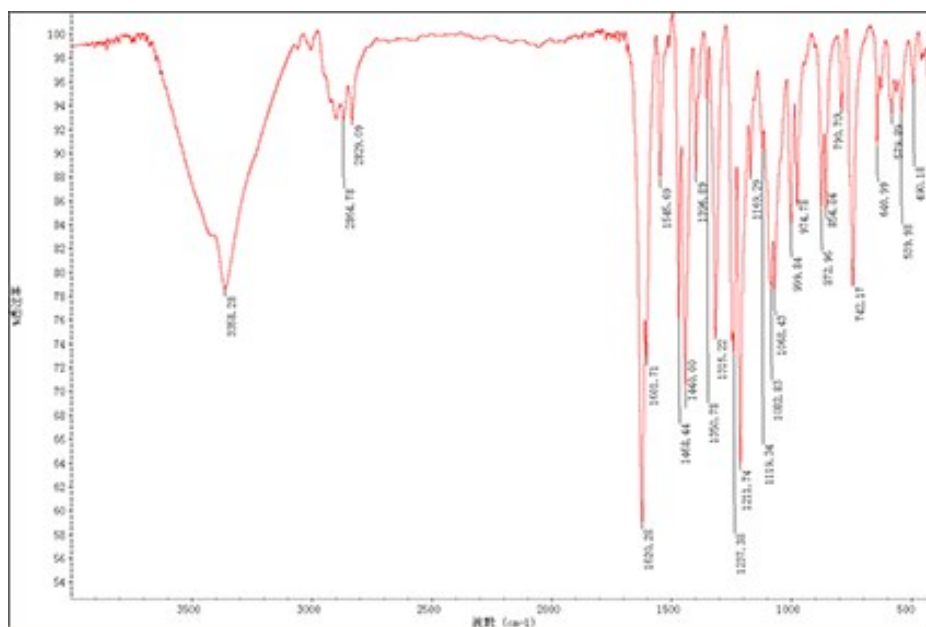

Fig. S1 IR spectrum of 1.

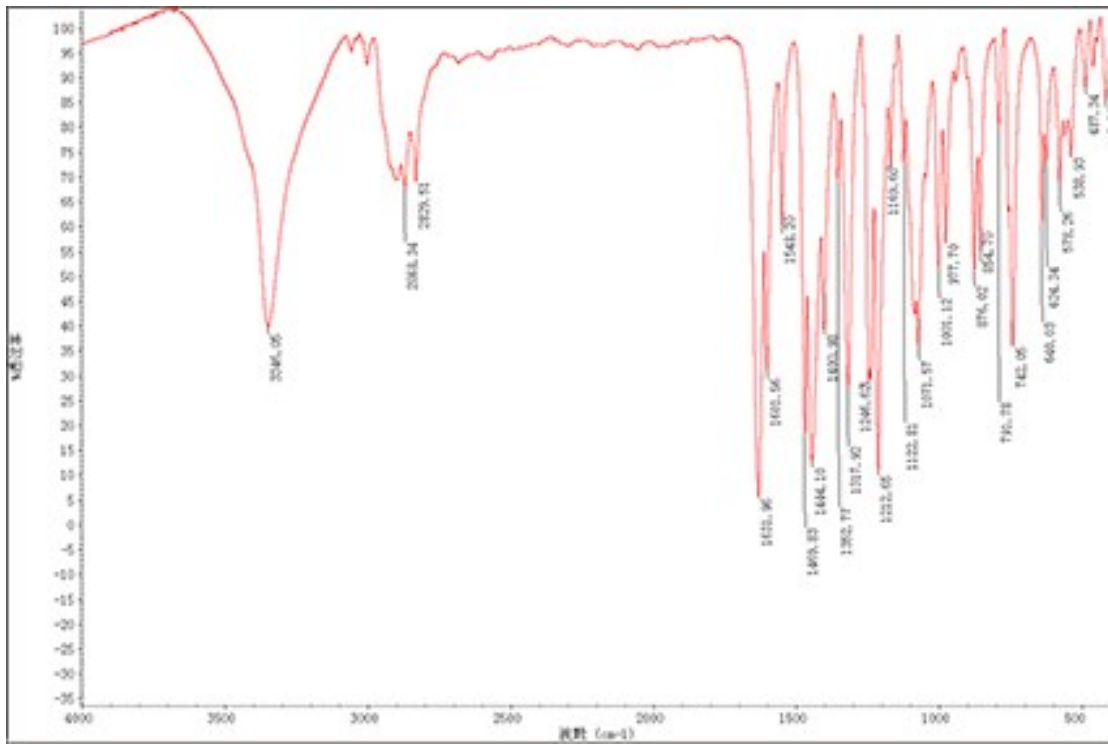

Fig. S2 IR spectrum of 2.

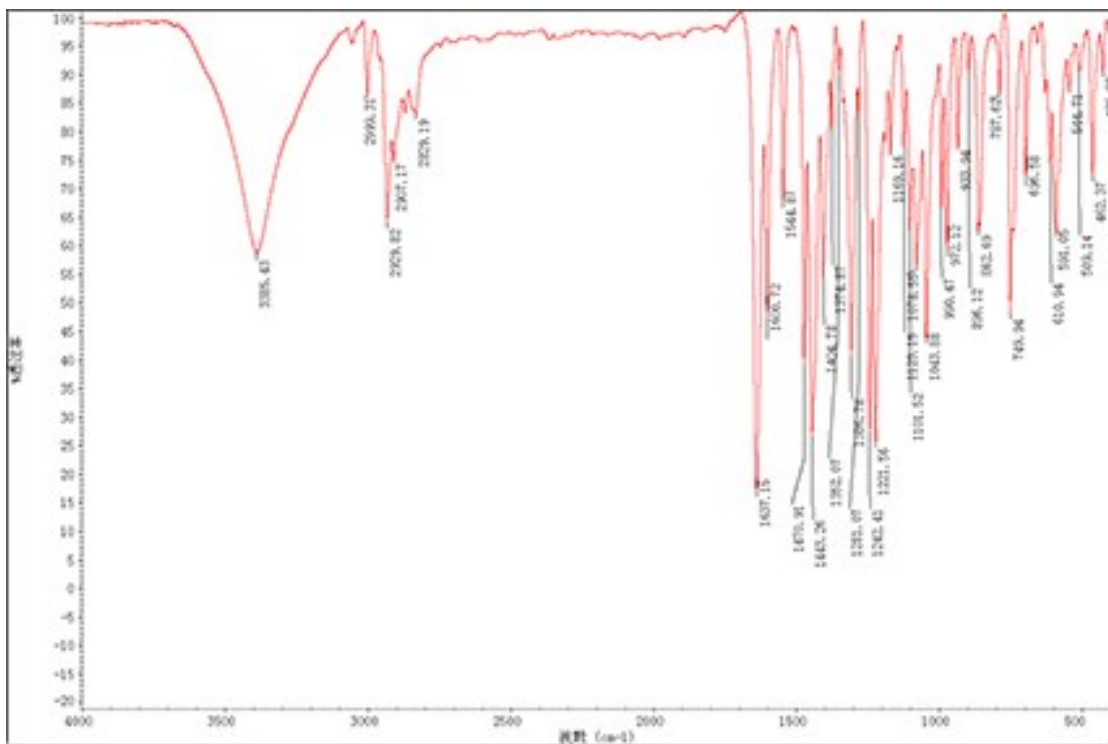

Fig. S3 IR spectrum of 3.

### 3. XRD patterns of complexes 1-3

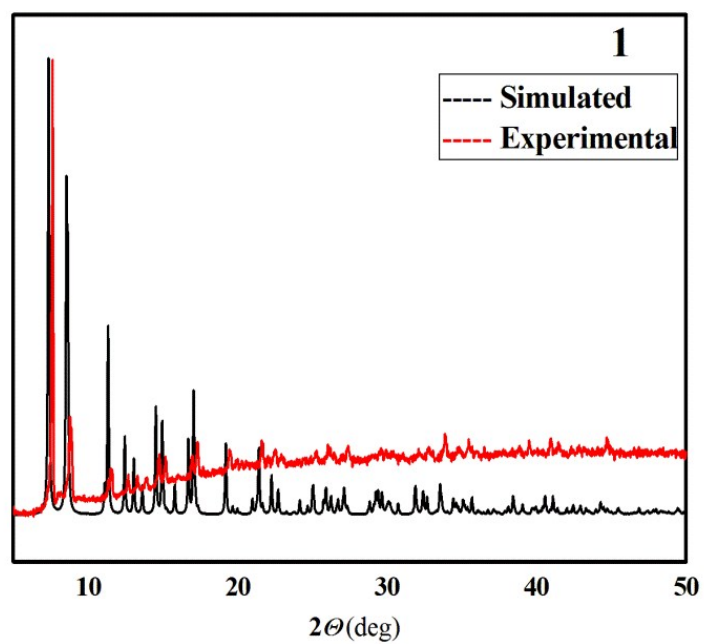

Fig.S4 XRD pattern of 1.

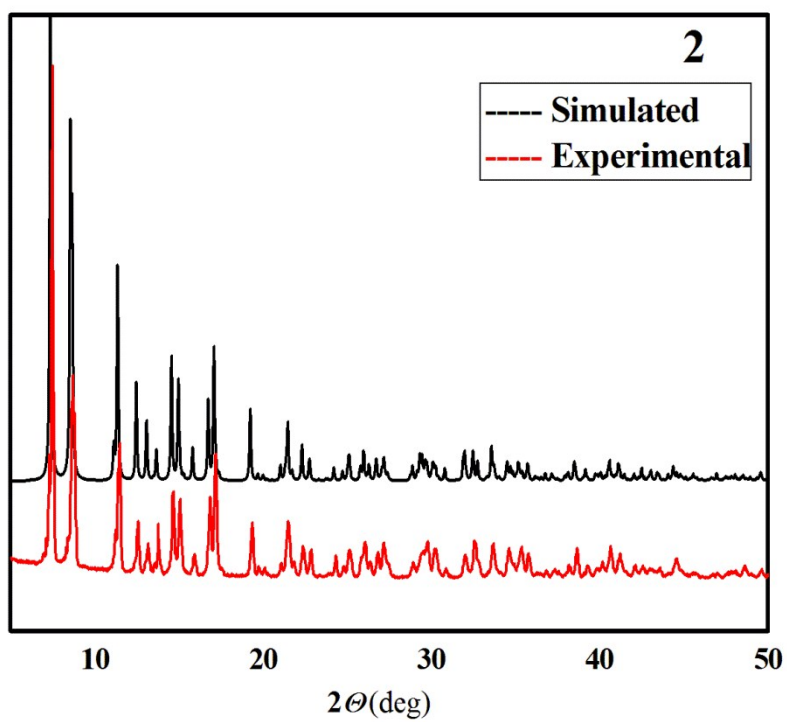

Fig.S5 XRD pattern of 2.

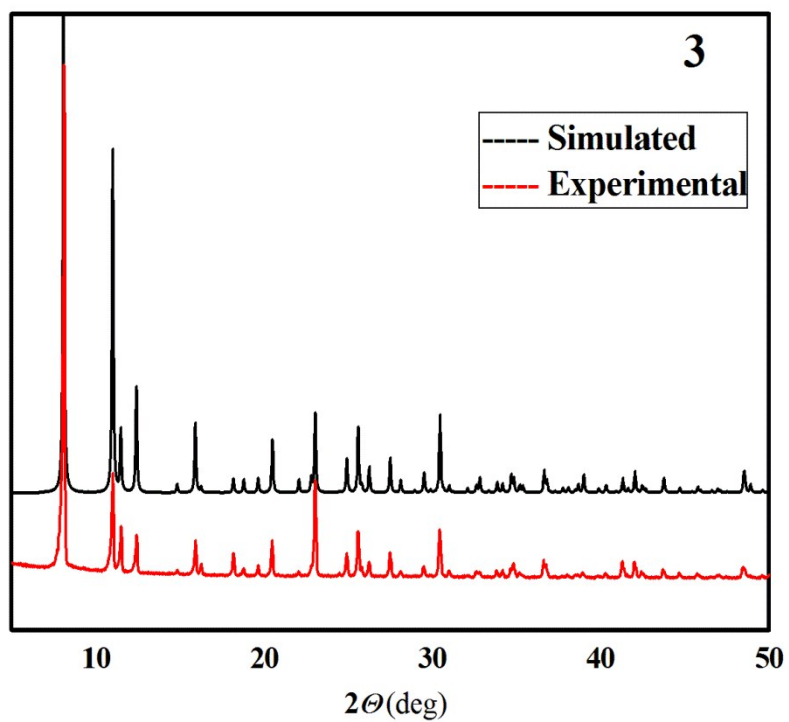

Fig.S6 XRD pattern of 3.
